# Supplementary material for: Angiotensin II Inhibits Adipogenic Differentiation and Promotes Mature Adipocyte Browning through the Corepressor CtBP1
Source: MDPI journal article supplement (doi:10.3390/biomedicines10123131), 2022-12-04
Supplement: s1 [file s1]

## Supplementary Materials

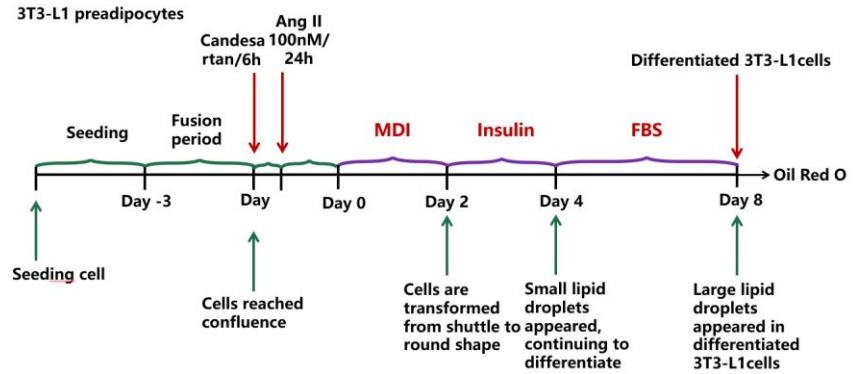

**Figure S1.** A scheme displaying the effects of Ang II and its receptor on 3T3-L1 adipogenic differentiation.

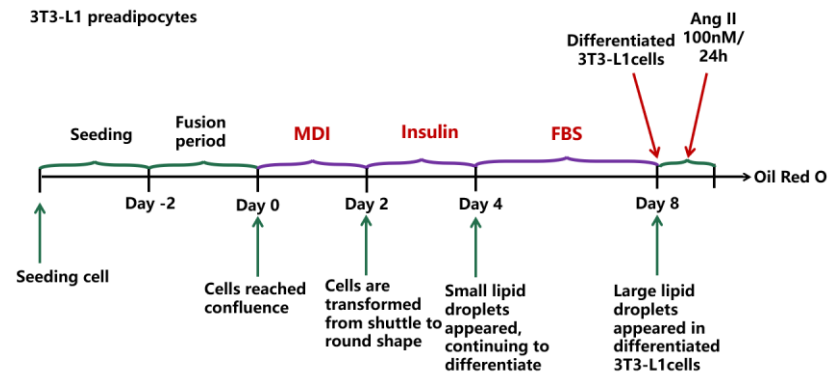

**Figure S2.** A scheme displaying the effects of Ang II on the function of mature adipocytes.

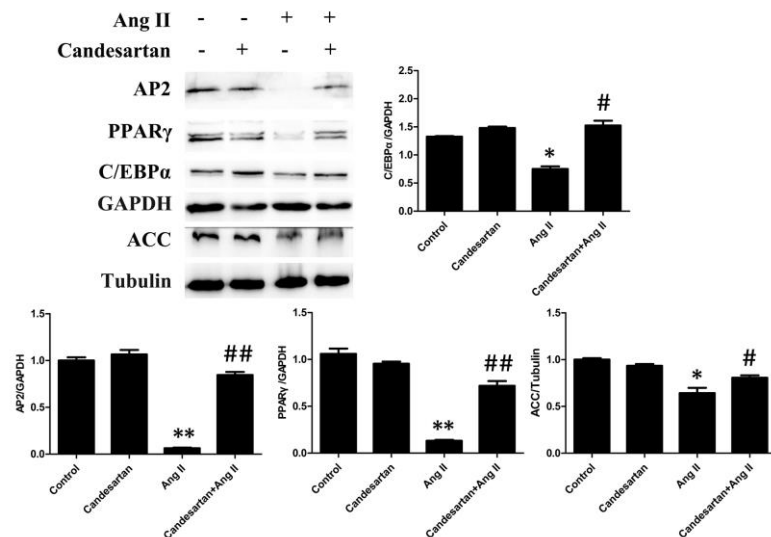

**Figure S3.** The effects of Ang II and its receptor on the expression of adipogenic markers (AP2, PPAR $\gamma$ , C/EBP $\alpha$ , ACC) during 3T3-L1 adipogenic differentiation process. Untreated 3T3-L1 cells were used as control. Histograms show the ratios of target proteins to GAPDH or tubulin. \*  $p < 0.05$  and \*\*  $p < 0.01$  vs. the control group; #  $p < 0.05$  and ##  $p < 0.01$  vs. Ang II-treated 3T3-L1 cells ( $n = 3$ ).

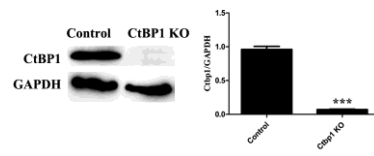

**Figure S4.** CtBP1 knockout in 3T3-L1 identified by Western blot analysis. Histogram shows the ratio of CtBP1 to GAPDH. \*\*\*  $p < 0.001$  vs. the control group ( $n = 3$ ).
